# Supplementary material for: A junction coverage compatibility score to quantify the reliability of transcript abundance estimates and annotation catalogs
Source: Life Sci Alliance. 2019 Jan 17;2(1):e201800175. doi: 10.26508/lsa.201800175 (PMC6337739; doi:10.26508/lsa.201800175)
Supplement: Supplementary file 1 [file LSA-2018-00175_TableS1.xlsx]

## Sheet: Sheet1
Table S1. Characteristics of the annotation catalogs used in this study. The StringTie annotation catalogs were obtained by running StringTie on each of the RNA-seq libraries, with the option to assemble new transcripts.
	Ensembl GRCh38.90	CHESS 2.0 assembly	StringTie HAP1	StringTie Cortex
Number of genes	58302	42881	77781	93833
Number of genes with associated Ensembl ID	58302	22262	18227	22618
Number of genes with a single associated Ensembl ID	58302	22262	15991	20091
Number of transcripts	200310	311845	159037	189566
Min number of isoforms per gene	1	1	1	1
Median number of isoforms per gene	1	3	1	1
Mean number of isoforms per gene	3.4	7.3	2	2
Max number of isoforms per gene	193	117	106	102
Number of genes with exactly one isoform	36139	14682	64984	78201
Min number of exons per transcript	1	1	1	1
Median number of exons per transcript	4	6	2	2
Mean number of exons per transcript	6	9.4	4.5	4.4
Max number of exons per transcript	363	363	116	106
Number of transcripts with exactly one exon	25029	4857	64871	76953
Min transcript length (bp)	8	59	28	28
Median transcript length (bp)	793	2421	687	695
Mean transcript length (bp)	1499	3162	1384	1380
Max transcript length (bp)	205012	210390	205012	205012
Min number of distinct junctions per gene	0	0	0	0
Median number of distinct junctions per gene	1	5	0	0
Mean number of distinct junctions per gene	6.2	10.2	2.5	2.4
Max number of distinct junctions per gene	390	391	171	127
Number of genes with exactly one distinct junction	7929	6269	2908	4334
Number of genes with no junctions	22753	3586	60870	72133
Number of transcripts present in fasta but not in gtf	18950	0	0	0
